# Supplementary material
Source: Springer Nature journal article supplement (https://www.springermedizin.de/resource/supplementary/12936_2012_2182_MOESM4_ESM.pdf/9542588)
Supplement: MOESM4 [file 9542588]

Figure 2.

### **Summary Points**

- The discovery, development and use of novel vector control tools will be required to achieve the goal of malaria elimination and eradication
- Evidence exists of the benefits of sub-lethal approaches for interrupting human-vector contact but epidemiological data is insufficient to influence policy-makers to recommend spatial repellent tools for disease control confidently
- The adoption of a new paradigm shift in vector control to include behavior modification will require a new set of laboratory and field assay tools, standardized endpoints and analyses which must also be endorsed and adopted by leading global public health authorities
